# Supplementary material for: Role of Local Treatment for Oligometastasis: A Comparability-Based Meta-Analysis
Source: PubMed Central journal article supplement — Cancer Res Treat. 2022 Aug 16;54(4):953–69. doi: 10.4143/crt.2022.329 (PMC9582460; doi:10.4143/crt.2022.329), 2022-08-16
Supplement: crt-2022-329_S1_Table.pdf [file crt-2022-329_S1_Table.pdf]

**S1 Table.** General information of included studies

| Author, target disease | Affiliation                                                            | Publication year | Patient recruit year | Study type | LCT group compared to control                | Total No. of patients | NOS score | Type of oligometastases; Preceding Tx. For primary dz. | Defined No. of oligomets.                       | Conflicts of interest |
|------------------------|------------------------------------------------------------------------|------------------|----------------------|------------|----------------------------------------------|-----------------------|-----------|--------------------------------------------------------|-------------------------------------------------|-----------------------|
| He, NSCLC [1]          | Sun Yat-sen University, China                                          | 2017             | 2003-2013            | R          | N/A                                          | 21                    | 7         | Synchronous and metachronous; OP                       | ≤ 3, in lung                                    | None                  |
| Iyengar, NSCLC [2]     | University of Texas Southwestern, US                                   | 2017             | 2014-2016            | P          | RCT                                          | 29                    | 8         | Synchronous; PR or SD after CTx.                       | Up to 6 lesions (including primary) in 3 organs | None                  |
| Sheu, NSCLC [3]        | MDACC, US                                                              | 2014             | 1998-2012            | R          | PSM, balanced except higher age              | 74                    | 9         | Synchronous; no PD after CTx.                          | ≤ 3                                             | None                  |
| Yano, NSCLC [4]        | Kyushu University, Japan                                               | 2010             | 1994-2004            | R          | N/A                                          | 93                    | 7         | Metachronous; surgery                                  | Controllable with surgery or RTx                | None                  |
| Frost, NSCLC [5]       | Charité, Evangelische Lungenklinik, DRK Klinikum Berlin-Mitte, Germany | 2018             | 2000-2016            | R          | PSM                                          | 180                   | 9         | Synchronous                                            | 1-4 in one organ                                | None                  |
| Gomez, NSCLC [6]       | MDACC, London health center, University of Colorado, US & UK           | 2019             | 2012-2016            | P          | RCT                                          | 49                    | 9         | Synchro and metachronous; CTx.                         | ≤ 3                                             | None                  |
| Gray, NSCLC [7]        | Harvard Medical School, US                                             | 2014             | 2000-2011            | R          | Younger age (p=0.027)                        | 66                    | 7         | Synchronous                                            | ≤ 4, brain only                                 | Industrial            |
| Hu, NSCLC [8]          | Shanghai Jiaotong University, China                                    | 2019             | 2010-2016            | R          | More brain mets, less lung mets. (p < 0.001) | 231                   | 7         | Synchronous; TKI                                       | ≤ 5 in single organ                             | None                  |

|                              |                                                                                     |      |           |   |                                                                                   |     |   |                                                           |                                     |            |
|------------------------------|-------------------------------------------------------------------------------------|------|-----------|---|-----------------------------------------------------------------------------------|-----|---|-----------------------------------------------------------|-------------------------------------|------------|
| Song, NSCLC [9]              | Cancer Hospital of China Medical University, Liaoning Cancer Hospital and Institute | 2020 | 2005-2019 | R | PSM, more peripheral location of mets. (p=0.048)                                  | 70  | 9 | Synchronous                                               | ≤5                                  | None       |
| Xu, NSCLC [10]               | Tongji University, China                                                            | 2018 | 2010-2016 | R | Lower T and N stage                                                               | 90  | 7 | Synchronous; PR or SD after TKI                           | ≤5                                  | None       |
| Ni, NSCLC [11]               | Shandong First Medical University, China                                            | 2020 | 2015-2018 | R | No significant difference                                                         | 86  | 7 | Synchronous                                               | ≤5                                  | None       |
| Shang, NSCLC (postop) [12]   | Shandong University, China                                                          | 2019 | 2005-2016 | R | No significant difference except mets. location                                   | 152 | 7 | Synchronous                                               | ≤5                                  | None       |
| Gore, SCLC (extended) [13]   | 57 centers                                                                          | 2017 | 2010-2015 | P | RCT, balanced except age (younger age in LCT, p=0.03)                             | 86  | 9 | Synchronous; PR or CR after CTx.                          | ≤4                                  | Industrial |
| Xu, SCLC (extended) [14]     | Tianjin Medical University, China                                                   | 2017 | 2010-2015 | R | PSM, more weight loss patient                                                     | 44  | 9 | Synchronous                                               | In one organ or in single RT portal | None       |
| Bouman-Wammes, prostate [15] | VUMC, Netherland                                                                    | 2017 | 2009-2015 | R | Higher PSA at Dx. (p=0.015), more single mets (p=0.003)                           | 63  | 7 | Metachronous; prostatectomy or RTx.                       | ≤ 3                                 | Industrial |
| Lan, prostate [16]           | Lanzhou General Hospital of Lanzhou Command, China.                                 | 2019 | 2005-2016 | R | Lower PSA (p=0.003), cT (p < 0.001), N stage (p=0.015), fewer bone mets (p=0.019) | 111 | 7 | Synchronous                                               | ≤ 5                                 | None       |
| Ost, prostate [17]           | Six insitutions in Belgium                                                          | 2018 | 2012-2015 | P | RCT                                                                               | 62  | 9 | Metachronous; OP, RTx.                                    | ≤ 3                                 | Industrial |
| Steuber, prostate [18]       | Six European and one US center                                                      | 2019 | 1993-2014 | R | PSM                                                                               | 659 | 9 | Metachronous; biochemical failure post-OP & adjuvant RTx. | ≤ 5                                 | None       |

|                            |                                              |      |           |   |                                                                      |     |   |                                             |                                  |                           |
|----------------------------|----------------------------------------------|------|-----------|---|----------------------------------------------------------------------|-----|---|---------------------------------------------|----------------------------------|---------------------------|
| Parker, prostate [19]      | 117 centers in UK and Swiss                  | 2018 | 2013-2016 | P | RCT                                                                  | 819 | 9 | Synchronous                                 | ≤ 3 (low burden subgroup)        | Industrial and government |
| Tsumura, prostate [20]     | Kitasato University, Japan.                  | 2019 | 2003-2013 | R | N/A                                                                  | 40  | 7 | Synchronous                                 | ≤ 5                              | None                      |
| Giessen, colorectal [21]   | 48 German centers                            | 2013 | 2000-2004 | P | More N-, better PS                                                   | 253 | 7 | Synchronous and metachronous; OP (95%)      | 1 (~95% of patients)             | Industrial                |
| Ruer, colorectal [22]      | 22 European centers                          | 2017 | 2002-2007 | P | RCT                                                                  | 119 | 9 | Synchronous and metachronous                | ≤ 9, all resectable or ablatable | None                      |
| Ruo, colorectal [23]       | MSKCC, US                                    | 2003 | 1996-1999 | R | More comorbidity (p=0.04), more liver only and single mets. (p=0.02) | 230 | 7 | Synchronous                                 | ≤ 3                              | None                      |
| Chen, esophagus [24]       | Wuhan univ, Zengzhou Univ, China             | 2019 | 2012-2015 | R | No significant difference                                            | 461 | 6 | Synchronous                                 | ≤ 3                              | None                      |
| Depypere, esophagus [25]   | University Hospitals Leuven, Belgium         | 2018 | 2002-2015 | R | N/A                                                                  | 20  | 7 | Synchronous or metachronous; NAC(R)T        | 3-5 mets in single organ         | None                      |
| Chen, HCC [26]             | Sun Yat-sen University Cancer Center, China. | 2018 | 2013-2016 | R | PSM                                                                  | 68  | 8 | Synchronous                                 | ≤ 5 in lung                      | None                      |
| Pan, HCC [27]              | Sun Yat-sen University Cancer Center, China. | 2017 | 2004-2013 | R | PSM                                                                  | 92  | 9 | Synchronous                                 | N/A                              | None                      |
| Morino, bile duct [28]     | Kyoto University, Japan.                     | 2020 | 1996-2015 | R | PSM, more ICC (p < 0.001), more local mets. location (p=0.005)       | 67  | 9 | Metachronous; R0 or R1 resection            | ≤ 3                              | None                      |
| Schulz, head and neck [29] | Klinikum rechts der Isar, Germany.           | 2018 | 2001-2016 | R | Intentioned match                                                    | 47  | 7 | Synchronous and metachronous; OP, CTx., RT; | 1 (77%), but ranged up to 10     | None                      |

|                         |                                                             |      |           |     |                                                                                              |     |   |                                                         |                                |            |
|-------------------------|-------------------------------------------------------------|------|-----------|-----|----------------------------------------------------------------------------------------------|-----|---|---------------------------------------------------------|--------------------------------|------------|
| Falk, sarcoma [30]      | 15 Multicenter, France                                      | 2015 | 2000-2012 | R   | Smaller primary tumor (p=0.04), more controlled primary (p=0.0003), less lung mets (p=0.006) | 281 | 7 | Synchronous and metachronous; OP 93%, R0 62% R1 23%     | ≤ 5                            | Industrial |
| Kagawa, NSCLC [31]      | Aichi Cancer Center, Japan                                  | 2020 | 2013-2018 | R   | No significant difference                                                                    | 38  | 7 | Oligoprogression after ICI (62% was initially stage IV) | ≤ 3 in single organ            | Industrial |
| Hsu, KH, NSCLC [32]     | National Chung Hsing Univ & Taichung Veterans hospt, Taiwan | 2021 | 2010-2018 | R   | N/A                                                                                          | 51  | 7 | Synchronous; TKI                                        | ≤ 5                            | None       |
| Zhao, NSCLC [33]        | NCC Beijing, China                                          | 2020 | 2012-2017 | R   | No significant difference                                                                    | 61  | 7 | Synchronous and metachronous                            | ≤ 5                            | Government |
| Li, NSCLC [34]          | Tianjin medical univ, China                                 | 2020 | 2014-2018 | R   | No significant difference                                                                    | 69  | 7 | Synchronous                                             | ≤ 5                            | Government |
| Gauvin, NSCLC [35]      | Univ of Montreal, Canada                                    | 2021 | 2005-2015 | R   | N/A                                                                                          | 67  | 7 | Synchronous (in 6 months after Dx.)                     | 1 M1b mets or ≤3 cerebral mets | Industrial |
| Chen, NSCLC [36]        | Sun-Yat-Sen Guangzhou, China                                | 2021 | 2004-2018 | R   | Less advanced primary, more neurologic symptom                                               | 139 | 7 | Synchronous                                             | ≤3                             | Government |
| Wang, NSCLC [37]        | Shandong univ, China                                        | 2021 | 2018-2020 | R   | No significant difference                                                                    | 152 | 6 | Synchronous and metachronous                            | ≤3                             | Government |
| Wang, NSCLC [38]        | Zhongda hospt. Southeast Univ, China                        | 2020 | 2013-2018 | R   | No significant difference                                                                    | 53  | 7 | Metachronous; failure after first CTx.                  | ≤5                             | Government |
| Yildirim, prostate [39] | 3 institutions in Turkey                                    | 2019 | 2012-2017 | R   | PSM                                                                                          | 92  | 9 | Synchronous and metachronous; ADT                       | ≤5                             | None       |
| Phillips, prostate [40] | Johns Hopkins and 2 other centers, US                       | 2020 | 2016-2018 | RCT | RCT                                                                                          | 54  | 9 | Metachronous; surgery (83%) RTx (17%)                   | ≤3                             | Industrial |

|                               |                                                                 |      |           |   |                                                        |     |   |                                                   |                                     |            |
|-------------------------------|-----------------------------------------------------------------|------|-----------|---|--------------------------------------------------------|-----|---|---------------------------------------------------|-------------------------------------|------------|
| Deek, prostate [41]           | Mayo & Johns Hopkins, US                                        | 2021 | 2013-2019 | R | No significant difference                              | 84  | 7 | Metachronous (oligoprogression); ADT (CRPC)       | ≤5                                  | Government |
| Boeri, prostate (3 arms) [42] | Mayo clinic, US                                                 | 2021 | 2009-2016 | R | 3 arm study; similar except younger in LCT (p < 0.001) | 328 | 7 | Metachronous; curative surgery or RTx.            | ≤ 5                                 | None       |
| Hu X, multiple [43]           | Beijing Geriatric hosppt & Airforce general hosppt, China       | 2021 | 2014-2020 | R | N/A                                                    | 242 | 7 | Methachronous                                     | ≤ 5                                 | Academic   |
| Palma, multiple (update) [44] | 10 institutions in Canada, Netherlands, Scotland, and Australia | 2020 | 2012-2016 | P | RCT                                                    | 99  | 9 | Metachronous; no progression after definitive Tx. | ≤ 5                                 | Industrial |
| Ji, pancreas [45]             | Nanjing medical univ, US                                        | 2021 | 2010-2019 | R | PSM                                                    | 46  | 9 | Synchronous                                       | ≤ 5                                 | Government |
| Shao, pancreas [46]           | Zhejiang Univ, China                                            | 2021 | 2009-2018 | R | No significant difference                              | 100 | 7 | Synchronous                                       | Resectable, liver confined mets.    | Government |
| Lan, breast (3 arms) [47]     | NCC Beijing, China                                              | 2020 | 2009-2014 | R | N/A                                                    | 50  | 7 | Metachronous; curative surgery                    | ≤ 3, one organ                      | None       |
| Moretto, colorectal [48]      | Pisa Univ, Italy                                                | 2020 |           | R | N/A                                                    | 312 | 7 | Synchronous and metachronous                      | ≤ 5, no more than 3 organs involved | Industrial |
| Li J, esophagus [49]          | Minyang central hosppt, China                                   | 2021 | 2009-2018 | R | Lower stage, less metastatic organ No.                 | 82  | 7 | Metachronous; surgery or CRT                      | ≤ 5, ≤ 3 per organ                  | Academic   |
| Shi Z, esophagus [50]         | Wuhan & Henan Univ, China                                       | 2021 | 2012-2017 | R | PSM                                                    | 214 | 9 | Synchronous (in 6 months after Dx.)               | ≤ 5                                 | Government |
| Kim K, HCC [51]               | Yonsei Univ, US                                                 | 2021 | 2008-2015 | R | PSM                                                    | 58  | 9 | Metachronous (~90%)                               | 1-4                                 | Academic   |
| Li W, NPX [52]                | Sun-Yat-Sen Guangzhou, China                                    | 2016 | 2003-2011 | R | PSM                                                    | 74  | 9 | Synchronous and metachronous; CTx.                | ≤ 3                                 | Government |

|                         |                              |      |           |   |                                                      |    |   |                                           |     |      |
|-------------------------|------------------------------|------|-----------|---|------------------------------------------------------|----|---|-------------------------------------------|-----|------|
| Wright, oropharynx [53] | Univ Pennsylvania, US        | 2021 | 2008-2017 | R | More single mets (no statistics)                     | 24 | 7 | Metachronous; TORS                        | ≤ 5 | None |
| Liu Y, RCC [54]         | Sun-Yat-Sen Guangzhou, China | 2021 | 2007-2019 | R | Tend to have less No. of lesions and involved organs | 90 | 7 | Synchronous and metachronous; nephrectomy | ≤ 5 | None |

ADT, androgen deprivation therapy; CR, complete response; CRT, chemoradiotherapy; CTx., chemotherapy; Dx., diagnosis; ICI, immune-checkpoint inhibitor; LCT, local consolidative therapy; mets., metastasis; N/A, not assessable; NOS, Newcastle-Ottawa scale; NSCLC, non-small cell lung cancer; OP, operation; P, prospective; PD, progressive disease; PR, partial remission; PS, performance status; PSA, prostate specific antigen; PSM, propensity score matching; R, retrospective; RCT, randomized controlled trial; RTx., radiotherapy; SD, stable disease; TKI, tyrosine kinase inhibitor; TORS, transoral robotic surgery.
