# Supplementary material for: Role of Local Treatment for Oligometastasis: A Comparability-Based Meta-Analysis
Source: PubMed Central journal article supplement — Cancer Res Treat. 2022 Aug 16;54(4):953–69. doi: 10.4143/crt.2022.329 (PMC9582460; doi:10.4143/crt.2022.329), 2022-08-16
Supplement: crt-2022-329_S2_Table.pdf [file crt-2022-329_S2_Table.pdf]

**S2 Table.** Clinical information of included studies

| Author, target disease     | LCT arm |                             |                                              |                |                                                         | Control arm |                             |                                     |                       |           | OS (LCT arm vs. control arm) |                           | PFS (LCT arm vs. control arm) |               |                           |         |
|----------------------------|---------|-----------------------------|----------------------------------------------|----------------|---------------------------------------------------------|-------------|-----------------------------|-------------------------------------|-----------------------|-----------|------------------------------|---------------------------|-------------------------------|---------------|---------------------------|---------|
|                            | No.     | No. of oligomets.           | Site                                         | Target of LCT  | Modality of LCT                                         | No.         | No. of oligomets.           | Site                                | Control               | Median FU | Median (mo)                  | 1/2 year rate             | p-value                       | Median (mo)   | 1/2 year rate             | p-value |
| He, NSCLC [1]              | 11      | 1 (60%); 2 (40%)            | Lung 100%                                    | M              | Resection of pulmonary mets and/or adj. CTx.            | 10          | N/A                         | Lung 100%                           | CTx.                  | 37.5      | 37 vs. 11.6                  | 100/70% vs. 80/40%        | 0.026                         | -             | -                         | -       |
| Iyengar, NSCLC [2]         | 14      | 2 (50%); 3-4 (28.6%)        | Lung or mediastinum >70%                     | M              | SBRT & CTx.                                             | 15          | 2 (40%); 3-4 (33%)          | Lung or mediastinum >70%            | CTx.                  | 9.6       | Not reached                  | -                         | -                             | 9.7 vs. 3.5   | 1 yr: 35.7% vs. 13.3%     | 0.01    |
| Sheu, NSCLC [3]            | 60      | Mean 1.28                   | Brain (~50%)                                 | M and P        | Conventional RTx. (76%)                                 | 14          | Mean 1.23                   | Brain (~50%)                        | CTx.                  | -         | -                            | 83.3/58.3 vs. 35.7/0%     | < 0.01                        | -             | 1 yr: 46.7% vs. 18.2%     | < 0.01  |
| Yano, NSCLC [4]            | 44      | -                           | -                                            | M (recurrence) | Surgery or RTx. And/or CTx.                             | 49          | -                           | -                                   | CTx. or SOC           | ~4 yr     | 74 vs. 10.9                  | 77.3/61.4% vs. 46.9/24.5% | < 0.05                        | -             | -                         | -       |
| Frost, NSCLC [5]           | 90      | 1 (85%); 2 (8%)             | Brain 57%; bone 10%; lung 9%                 | M and/or P     | Lobectomy, CCRT, SBRT; 79% received CTx.                | 90          | 1 (76%); 2 (14%)            | Brain 32%; bone 22%; lung 21%       | CTx. (96%)            | 32 vs. 19 | 60.4 vs. 22.5                | 92.2/76 vs. 81.9/45.9%    | < 0.001                       | 25.1 vs. 8.2  | 67.8/52.2% vs. 31/8.9%    | < 0.001 |
| Gomez, NSCLC [55]          | 25      | 0-1 (68%); 2-3 (32%)        | Brain 28%; other 72%                         | M and/or P     | RTx. or surgery & standard maintenance                  | 24          | 0-1 (62%); 2-3 (38%)        | Brain 25%; other 75%                | Standard maintenance  | 38.8      | 41.2 vs. 17                  | 84/68% vs. 62.5/45.8%     | 0.017                         | 14.2 vs. 4.4  | 52/28% vs. 20.8/12.5%     | 0.022   |
| Gray, NSCLC [7]            | 38      | 1 (50%); 2-4 (50%)          | Brain 100%                                   | P              | ATT (surgery or >45Gy RTx. to thorax); brain RTx. & CTx | 28          | 1 (50%); 2-4 (50%)          | Brain 100%                          | CTx and/or Brain RTx. | -         | 26.4 vs. 10.5                | 71/54% vs. 46/26%         | < 0.001                       | -             | -                         | -       |
| Hu, NSCLC [8]              | 143     | 1-3 (81%); 4-5 (19%)        | Brain 44%; Bone 35%                          | M              | Surgery and/or radiotherapy and TKI                     | 88          | 1-3 (83%); 4-5 (17%)        | Bone 42%; lung 33%                  | CTx. (TKI)            | 24        | 34 vs. 21                    | 95.3/72.1% vs. 84.1/40.9% | 0.001                         | 15 vs. 10     | 60.7/18.6% vs. 33.3/10.8% | < 0.001 |
| Song, NSCLC [9]            | 35      | 1 (46%); 2 (29%); 3-5 (26%) | Lung 57%; bone 40%; liver 30%                | M and/or P     | Surgery or RTx. and CTx.                                | 35          | 1 (23%); 2 (40%); 3-5 (37%) | Lung 60%; bone 54%                  | CTx.                  | -         | -                            | 51.4/28.6% vs. 31.4/5.7%  | 0.002                         | -             | -                         | -       |
| Xu, NSCLC [10]             | 51      | 1 (49%); 2-3 (51%)          |                                              | P and/or M     | Surgery or RTx. After TKI CTx.                          | 39          | 1 (41%); 2-3 (51.3%)        |                                     | CTx. (TKI)            | 38        | 40.9 vs. 30.8                |                           | < 0.001                       | 20.6 vs. 13.9 | 86.3/25.6% vs. 70.5/0%    | < 0.001 |
| Ni, NSCLC [11]             | 34      | 1-3 (85%); 4-5 (15%)        | Lung (40%); liver (23%); adrenal gland (16%) | M and/or P     | TKI & MWA                                               | 52          | 1-3 (89%); 4-5 (11%)        | Lung (32%); bone (23%); liver (20%) | CTx. (TKI)            | 36        | 34.8 vs. 22.7                | 94.1/67.6% vs. 90.3/46.2% | 0.04                          | 16.7 vs. 12.9 | 88.2/23.5% vs. 61.5/0%    | 0.02    |
| Shang, NSCLC (postop) [12] | 105     | 1 (73%); 2-5 (27%)          | LN (46%); brain (24%); lung (19%)            | M and/or P     | RTx. or RFA and/or CTx.                                 | 47          | 1 (72%); 2-5 (28%)          | LN (72%) lung (32%)                 | CTx. or BSC           | 19        | 19 vs. 20                    | 1yr: 72.4 vs. 72.3%       | 0.519                         | 10 vs. 7      | 1 yr: 40.9 vs. 29.8%      | 0.006   |

|                              |     |                                 |                                        |            |                                         |     |                                 |                                     |                        |        |                                                   |                                                                                       |            |                               |                           |         |
|------------------------------|-----|---------------------------------|----------------------------------------|------------|-----------------------------------------|-----|---------------------------------|-------------------------------------|------------------------|--------|---------------------------------------------------|---------------------------------------------------------------------------------------|------------|-------------------------------|---------------------------|---------|
| Gore, SCLC (extended) [13]   | 44  | 1 (32%); 2-4 (68%)              | Adrenal 25%; distant LN 23%; liver 23% | P          | PCI and cRTx. (45 Gy/15F)               | 42  | 1 (41%); 2-4 (60%)              | Distant LN 31%; Bone 26%; Liver 24% | PCI                    | 9      | 13.8 vs. 15.8                                     | 1yr: 50.8 vs. 60.1%                                                                   | 0.21       | 4.9 vs. 2.9                   | 1 yr: 23.9 vs. 20.5%      | 0.01    |
| Xu, SCLC (extended) [14]     | 22  | -                               | -                                      | M and/or P | CTx and RTx                             | 22  | -                               | -                                   | CTx.                   | 36.4   | -                                                 | 72.7/25.2 vs. 18.2/12.7%                                                              | 0.002      | -                             | 40.9/19.3 vs. 9.1/4.8%    | 0.006   |
| Bouman-Wammes, prostate [15] | 43  | 1 (81%); 2 (14%)                | LN 77%; bone 21%                       | M          | SBRT (mostly 30 Gy/3F or 35 Gy/7F)      | 20  | 1 (45%); 2 (40%)                | LN 65%; Bone 35%                    | Active surveillance    | -      | -                                                 | -                                                                                     | -          | 17.3 vs 4.2                   | 72.1/35.8% vs. 22.6/0%    | < 0.001 |
| Lan, prostate [16]           | 35  | 1 (26%) 2 (37%) 3 (20%)         | Bone 100%                              | P          | Prostatectomy & ADT                     | 76  | 1 (8%) 2 (32%) 3 (30%)          | Bone 100%                           | ADT                    | 35     | -                                                 | CSS 3/5 yr: 90.8/63.6% vs. 87.9/74.9%                                                 | 0.773      | (PSA-RFS) 32 vs. 17           | 82.8/62.8% vs. 65.8/38.2% | 0.184   |
| Ost, prostate [17]           | 31  | 1 (58%); 2 (19%); 3 (22%)       | LN 55%; non-nodal 45%                  | M          | SBRT (81%) or resection                 | 31  | 1 (29%); 2 (32%); 3 (39%)       | LN 55%; non-nodal 45%               | Active surveillance    | 3 yr   | -                                                 | -                                                                                     | -          | (ADT-free survival) 21 vs. 13 | 70.9/45.2% vs. 64.5/32.3% | 0.11    |
| Steuber, prostate [18]       | 165 | -                               | Pelvic LN ~90%                         | M          | PLND or SBRT (≥ 30 Gy/6F) and ADT       | 494 | -                               | Pelvic LN ~90%                      | ADT                    | -      | -                                                 | CSS 5/10 yr: 98.6/95.6 vs. 95.7/84.8% OS 3/5/10yr: 99.2/98.7/93.2 vs. 98.2/95.4/85.5% | 0.03; 0.23 | -                             | -                         | -       |
| Parker, prostate [19]        | 410 | -                               | Bone 76%; distant LN 36%               | P          | RT and ADT                              | 409 | -                               | Bone 76%; distant LN 34%            | ADT                    | 37     | -                                                 | 98.8/92.5/82.6% vs. 96.7/87.7/74.8%                                                   | 0.007      | -                             | 89.6/72.8% vs. 86.3/69.6% | 0.033   |
| Tsumura, prostate [20]       | 22  | -                               | Bone or pelvic LN                      | M          | Metastatic RTx., prostate brachy & HTx. | 18  | -                               | Bone or pelvic LN                   | Prostate brachy & HTx. | 62.5   | -                                                 | -                                                                                     | -          | -                             | 94.4/88.9% vs. 95.5/73.3% | 0.027   |
| Giessen, colorectal [21]     | 38  | 1 (95%)                         | Liver 100%                             | M          | Hepatic resection and CTx.              | 215 | 1 (100%)                        | Liver 100%                          | CTx.                   | -      | 48.0 (95% CI: 42-54) vs. 17.0 (95% CI: 13.9-20.1) | 97.4/89.5% vs. 68/37.6%                                                               | < 0.001    | 16.6 vs. 6.5                  | 63.2/36.8% vs. 21.2/5.2%  | <0.001  |
| Ruer, colorectal [22]        | 60  | 1-3 (48%); 4-6 (30%); 7-9 (22%) | Liver 100%                             | M          | RFA, surgery and/or CTx.                | 59  | 1-3 (31%); 4-6 (46%); 7-9 (24%) | Liver 100%                          | CTx.                   | 9.7 yr | 45.6 vs. 40.5                                     | 91.7/75% vs. 89.8/74.5% (5 yr: 43.1)                                                  | 0.01       | 16.8 vs. 9.9                  | 58.3/35% vs. 40.7/20.3%   | 0.005   |

|                            |     |                                                     |                                |                |                                                                                 |     |                                                   |                              |                  |                           |                                                      |                           |          |                  |                         |         |  |
|----------------------------|-----|-----------------------------------------------------|--------------------------------|----------------|---------------------------------------------------------------------------------|-----|---------------------------------------------------|------------------------------|------------------|---------------------------|------------------------------------------------------|---------------------------|----------|------------------|-------------------------|---------|--|
|                            |     |                                                     |                                |                |                                                                                 |     |                                                   |                              |                  |                           |                                                      | vs 30.3%)                 |          |                  |                         |         |  |
| Ruo, colorectal [23]       | 127 | 1 (68%); 2(26%); 3(6%)                              | Liver 56%                      | P              | Bowel surgery and CTx.                                                          | 103 | 1 (53%); 2(30%); 3(17%)                           | Liver 41%                    | CTx. (83.5%)     |                           | 16 vs. 9                                             | 63.8/25% vs. 35.9/6%      | < 0.001  |                  |                         |         |  |
| Chen, esophagus [24]       | 196 | -                                                   | -                              | M and P        | CCRT (IMRT, 50 Gy/25F to primary; 45Gy/15F to metastases; cisplatin/paclitaxel) | 265 | -                                                 | -                            | CTx              | 11.5                      | 16.8 (95% CI: 15.5-18.1) vs 14.8 (95% CI: 13.2-16/4) | 72.8/27.2% vs. 63.5/17.5% | 0.056    | 8.7 vs. 7.3      | 27.6/4.7% vs. 21.9/0.9% | 0.002   |  |
| Depypere, esophagus [25]   | 10  | -                                                   | Lung 50%; adrenal 20%          | P              | Esophagectomy +/- lung metastectomy                                             | 10  | -                                                 | Liver 50%; brain 30%         | CTx.             | -                         | 21.4 vs 12.1                                         | 80/40% vs. 50/10%         | 0.042    | -                | -                       | -       |  |
| Chen, HCC [26]             | 34  | -                                                   | Lung 100%                      | M and/or P     | TACE, RFA, resection & sorafenib                                                | 34  | -                                                 | Lung 100%                    | Sorafenib        | 8.4                       | 18.4 vs. 7.4                                         | 67.6/47% vs. 35.3/23.5%   | 0.015    | TTP: 3.1 vs. 2.3 | (TTP) 11.8/0% vs. 0/0%  | 0.009   |  |
| Pan, HCC [37]              | 46  | Mean 2.22 +/- 1.35                                  | LN 100%                        | M (lymph node) | RFA; and BSC or sorafenib                                                       | 46  | Mean 2.74 +/- 1.37                                | LN 100%                      | BSC or sorafenib | 14 vs 13.8                | 13 vs. 7.8                                           | 58.3%/11.7% vs. 17.9/0%   | 0.001    | -                | -                       | -       |  |
| Morino, bile duct [28]     | 33  | Median 1 (1-3)                                      | Liver 39%; LN 27%; lung 12%    | M (recurrence) | Surgery, RT, RFA, TACE and/or CTx.                                              | 34  | Median 1 (1-3)                                    | Local 35%; liver 29%; LN 21% | CTx. or BSC      | 12.6                      | 48.6 vs. 14.2                                        | 97/84.8% vs. 64.7/20.5%   | < 0.001  | -                | -                       | -       |  |
| Schulz, head and neck [29] | 37  | 1 (70%); 2-3 (16%)                                  | Lung 59%; bone 22%             | M              | RTx. or resection and/or CTx.                                                   | 10  | 1 (100%)                                          | Lung 90%                     | CTx. or BSC      |                           | 24 vs. 7                                             | 67.6%/51.3% vs. 20%/10%   | NA       | -                | -                       | -       |  |
| Falk, sarcoma [30]         | 164 | -                                                   | Lung 51%; liver 7%             | M              | RTx. (> 50 Gy), RFA, OP removing all mets +/- CTx.                              | 117 | -                                                 | Lung 69%; liver 7%           | CTx. in majority | 25.7                      | -                                                    | 79.6/63.6% vs. 52.3/36.3% | < 0.0001 | -                | -                       | -       |  |
| Kagawa, NSCLC [31]         | 10  | -                                                   | Abd LN 50%                     | M              | Surgery and RTx and/or ICI                                                      | 28  | -                                                 | -                            | ICI or CTx       | -                         | -                                                    | 100/71.1% vs. 100/88.9%   | NS       | -                | -                       | -       |  |
| Hsu, KH, NSCLC [32]        | 17  | -                                                   | -                              | p              | SBRT or RT (50-70 Gy) & prior TKI                                               | 34  | -                                                 | -                            | Prior TKI        | 35.1 (RT) 32.1 (control)  | -                                                    | -                         | -        | NR vs 14.3       | 100/76.6 vs. 55.9/28.1% | < 0.001 |  |
| Zhao, NSCLC [33]           | 21  | 1 (71.4%); 2 (23.8%)                                | Liver 100%                     | M              | RFA & CTx.                                                                      | 40  | 1 (65%); 2 (25%)                                  | Liver 100%                   | CTx              | 36.4 (RFA) 39.1 (control) | 27.7 vs. 17.7                                        | 95.5/57.3 vs. 77.8/38.5%  | 0.152    | 11 vs 5.2        | 47.5/9.6 vs. 15/0%      | 0.001   |  |
| Li, NSCLC [34]             | 32  | 1 (12.5%); 2 (21.9%); 3(21.9%); 4 (28.1%); 5(15.6%) | Thoracic (37.5%) other (62.5%) | -              | <sup>125</sup> I brachy+CTx                                                     | 37  | 1 (16.2%); 2 (10.8%); 3 (27%); 4(35.1%); 5(10.8%) | Thoracic (27%) others (73%)  | CTx              | 23                        | 17.6 vs 11.2                                         | 71.6/49.5 vs. 32.3/18.2%  | 0.042    | 11.6 vs. 6.3     | 50.4/23.3 vs. 36.1/9.8% | 0.036   |  |

|                         |                     |                                     |                                             |            |                                                                       |     |                                    |                                     |                                           |      |               |                                                               |                   |                     |                                                                  |                                |
|-------------------------|---------------------|-------------------------------------|---------------------------------------------|------------|-----------------------------------------------------------------------|-----|------------------------------------|-------------------------------------|-------------------------------------------|------|---------------|---------------------------------------------------------------|-------------------|---------------------|------------------------------------------------------------------|--------------------------------|
| Gauvin, NSCLC [35]      | 29                  |                                     | Brain (86%)                                 | M and/or P | RT or CCRT (>60 Gy) or R0 surgery                                     | 38  |                                    | Brain (66%)                         | CTx. And/or palliative RT                 |      | 26 vs 5       | 93/54 vs. 31/14%                                              | 1E-04             | 17.5 vs. 3.4        | 68/33 vs. 18/7%                                                  | 0.001                          |
| Chen, NSCLC [36]        | 70                  | 1 (75.7%)<br>2-3 (24.3%)            | Brain 100%                                  | M and P    | RT                                                                    | 69  | 1 (59.4%)<br>2-3 (40.6%)           | Brain 100%                          | CTx                                       | 49   | 33.2 vs. 16.8 | 82.5/57.8 vs. 59.7/31.7                                       | 0.002             | -                   | -                                                                | -                              |
| Wang, NSCLC [37]        | 59                  | 1 (47.4%)<br>2 (33.9%)              | Brain (44%),<br>bone (18.6%),<br>lung (29%) | M or P     | RT (one site only) & ICI                                              | 93  | 1 (35.5%)<br>2 (31.2%)             | -                                   | ICI                                       | 8.1  | -             | -                                                             | -                 | 13.8 vs. 8.9        | 53.8/44.8 vs. 42.1/32.4                                          | 0.035                          |
| Wang, NSCLC [38]        | 25                  | m3.36                               | Lung, adrenal gland, Liver, LNs             | M and P    | <sup>125</sup> I brachy                                               | 28  | m3.43                              | Lung, adrenal gland, Liver, LNs     | CTx                                       | 13   | 12.8 vs. 15.2 | 59.5/23.9 vs. 62.6/22.3%                                      | 0.847             | -                   | -                                                                | -                              |
| Yildirim, prostate [39] | 46                  | M2(1-5)                             | Bone 72%                                    | M and P    | IMRT (86%): M78 Gy & 54 Gy (prostate & pelvis), M30 Gy (bone) and ADT | 46  | M2(1-5)                            | Bone 64%                            | ADT                                       | 14.2 | 24.2 vs. 21.4 | 75.8/53/28.7 vs. 74.9/36.6/7.6%                               | 0.08              | 8.5 vs.7.8          | 30.6/10.2/10.2 vs. 30/7.7/0 %                                    | 0.5                            |
| Phillips, prostate [40] | 36                  | Mean 2.03                           | LN 67%<br>bone 33%                          | M and P    | SBRT 24-48 Gy /3-5F                                                   | 18  | Mean 1.66                          | LN 58%<br>bone 42%                  | Observation (allow CTx or ADT after 6 mo) | 18.8 | -             | -                                                             | -                 | not reached vs. 5.8 | 66.2 vs. 42.3%                                                   | 0.002                          |
| Deek, prostate [41]     | 31                  | 1 (32.3%);<br>2 (19.4%)<br>3 (9.7%) | Bone or LN, few visceral                    | M          | SBRT & systemic Tx.                                                   | 52  | 1 (28.8%)<br>2 (15.4%)<br>3 (7.7%) | Bone or LN, few visceral            | Systemic Tx.                              | 30.9 | -             | 93/90.3/60.7 vs. 97.8/76.8/69.5%                              | 0.46              | 9.7 vs. 4.2         | 44.8/19.3/12.5 vs. 23.4/12.8/5.9 %                               | 0.07                           |
| Boeri, prostate [42]    | 63(EB RT);191(SLND) | M2 (1-2)                            | EBRT: pelvic 81%<br>SLND: pelvic 91%        | M          | 1) SLND and/or ADT,<br>2) EBRT & ADT                                  | 74  | M2(1-3)                            | Pelvic 51.4<br>retroperitoneum 32.4 | ADT                                       | 46.7 | -             | 3/5yr CSM: 97.1/93.3% (sLND), 92.5/77.1% (RT), 92.5/80% (aDT) | SLND vs ADT (p=S) | -                   | 3/5 yr SSM: 81.1/75.8% (SLND), 74.3/56.0% (RT), 68.3/42,6% (ADT) | SLND vs. ADT, RT vs. ADT (p=S) |
| Hu, multiple [43]       | 86                  | 1-2 (66.3%)<br>3-5 (33.7%)          | Bone, brain, lung, liver                    | M          | RT (inc. SBRT, WBRT) & CTx. Or HTx.                                   | 156 | 1-2 (56.4%)<br>3-5 (43.6%)         | Bone, brain, lung, liver            | CTx or HTx                                | 36   | 25 vs. 16     | 88.3/53.6% vs 72.5/20.8%                                      | 0.001             | -                   | -                                                                | -                              |
| Palma, multiple [44]    | 66                  | 1 (46%); 2 (29%); 3 (18%)           | Lung 43%;<br>bone 35%                       | M          | SBRT and/or CTx., palliative RT                                       | 33  | 1 (36%); 2 (40%); 3 (18%)          | Lung 53%;<br>bone 31%               | CTx., and/or palliative RTx               | 51   | 50 vs. 28     | 84.3/68.9% vs. 87.6/58.1%                                     | 0.006             | 11.6 vs. 5.4        | 50.2/35.9 vs. 19/12.5%                                           | 0.001                          |
| Ji, pancreas [45]       | 23                  | -                                   | Liver 100%                                  | P          | SBRT (m41Gy,5-                                                        | 23  | -                                  | Liver 100%                          | CTx                                       | 20.9 | -             | 6 mo/1 yr OS:                                                 | 0.115             | -                   | 6 mo/1 yr PFS: 29.4/0% vs.                                       | 0.468                          |

|                          |                                  |                          |                                       |            |                                                   |     |                                         |                                      |                         |           |                         |  |                                                        |        |                       |                                                 |                                             |
|--------------------------|----------------------------------|--------------------------|---------------------------------------|------------|---------------------------------------------------|-----|-----------------------------------------|--------------------------------------|-------------------------|-----------|-------------------------|--|--------------------------------------------------------|--------|-----------------------|-------------------------------------------------|---------------------------------------------|
|                          |                                  |                          |                                       |            | 7F)+CTx                                           |     |                                         |                                      |                         |           |                         |  | 58.3/34% vs. 44/16.5%                                  |        |                       | 20.6/5.2%                                       |                                             |
| Shao, pancreas [46]      | 50                               | -                        | Liver 100%                            | M and P    | M and P surgery+CTx.                              | 50  |                                         | Liver 100%                           | Palliative surgery+CTx. |           | 16 vs. 6                |  | 63.8/29 vs. 24/2%                                      | 0.001  | -                     | -                                               | -                                           |
| Lan, breast [47]         | 20 (surgery); 10 (RT, RFA, TACE) | -                        | Lung, liver, bone                     | M          | Surgery & systemic Tx., other local & systemic Tx | 20  | -                                       | Lung, liver, bone                    | Systemic Tx.            | 65.9      | 113.7 vs. 59.4 vs. 42.4 |  | 100/85.2 (surg); 80/80 (other LT); 85.2/85.2 (control) | 0.049  | 49.6 vs. 13.8 vs. 6.9 | 80/65 (surg), 60/30 (other LT), 36/20 (control) | 0.001 (surgery < control or other local Tx) |
| Moretto, colorectal [48] | 121                              | -                        | -                                     | M and/or P | Surgery, RFA, SBRT                                | 191 | -                                       | -                                    | -                       | -         | 52.6 vs. 28.0           |  | 97.8/86.3 vs. 85.9/61%                                 | <0.001 | 23.9 vs. 10.6         | 79.2/50.4 vs. 45.1/15.9%                        | <0.001                                      |
| Li, esophagus [49]       | 55                               | 1 (56.4%), 2 (25.5%)     | Bone (31%), lung (31%), liver (14.5%) | M          | IMRT (M60Gy) and/or CTx                           | 27  | 1 (51.9%), 2 (22.0%)                    | Bone (52%), lung (26%), liver (7.4%) | CTx (90%), BSC (10%)    | 35        | 14 vs. 7                |  | 64.9/22.6 vs. 36.7/13.2                                | 0.016  | -                     | -                                               | -                                           |
| Shi, esophagus [50]      | 107                              | 1-3 (62.6%), 4-5 (33.6%) | -                                     | M and P    | CCRT (IMRT 50 Gy to primary, 45 for metastases)   | 107 | 1-3 (66.4%), 4-5 (33.6%)                | -                                    | CTx                     | 42.3      | 18.8 vs. 16.2           |  | 76.9/41.7 vs. 70.2/20.7%                               | 0.003  | 10 vs. 7.4            | 41/15.7 vs. 26.3/2.3%                           | <0.001                                      |
| Kim, HCC [51]            | 36                               | -                        | Lung 100%                             | M and P    | Surgery, RT and/or CTx.                           | 22  | -                                       | Lung 100%                            | CTx.                    | 27 and 23 | -                       |  | 88.5/66.6 vs. 63.3/31.2%                               | <0.001 | -                     | 58.9/47.0 vs. 21.2/10.6%                        | 0.005                                       |
| Li W, NPX. [52]          | 37                               | -                        | Liver 100%                            | M          | RFA+CTx.                                          | 37  | -                                       | Liver 100%                           | CTx.                    | 15.4      | 32.5 vs. 18.8           |  | 89/61.2 vs. 74.3/37.6%                                 | 0.025  | -                     | 64.4/25.2 vs. 47.9/14%                          | 0.037                                       |
| Wright, oropharynx [53]  | 12                               | 1 (66%) 2 (34%)          | Lung (83.3%), bone (16.7%)            | M          | Surgery, RT (> 60 Gy) or SBRT and/or CTx.         | 12  | 2 (28.6%); 3 (35.7%); 4 (28.6%); 5 (7%) | Lung 100%                            | CTx.                    | 34.3      | NR vs. 40.7             |  | 100/100 vs. 100/75%                                    | 0.004  | -                     | 82.4/55.4 vs. 7.4/na                            | 0.001                                       |
| Liu Y, RCC [54]          | 40                               | 1-2 (62.5%) 3-5 (37.5%)  | -                                     | M          | SBRT+TKI                                          | 50  | -                                       | -                                    | TKI                     | 31        | -                       |  | CSS: 100/100 vs. 100/79.5%                             | 0.044  | 26 vs. 17.9           | 82.9/53.6 vs. 61.1/35.4%                        | 0.049                                       |

Abd, abdominal; ADT, androgen deprivation therapy; ATT, aggressive thoracic therapy; BSC, best supportive care; CCRT, concurrent chemoradiotherapy; CSS, cancer specific survival; CTx., chemotherapy; IMRT, intensity modulated radiotherapy; LCT, local consolidation therapy; LN, lymph node; M, metastases; MWA, microwave ablation; NSCLC, non-small cell lung cancer; OP, operation; OS, overall survival; P, primary disease; PCI, prophylactic cranial irradiation; PFS, progression-free survival; PLND, pelvic lymph node dissection; RFA, radiofrequency ablation; RTx., radiotherapy; SBRT, stereotactic body radiotherapy; SCLC, small cell lung cancer; TACE, transarterial chemoradiotherapy; TKI, tyrosine kinase inhibitor; TTP, time to progression; Tx., therapy.
