# Supplementary material for: Role of Local Treatment for Oligometastasis: A Comparability-Based Meta-Analysis
Source: PubMed Central journal article supplement — Cancer Res Treat. 2022 Aug 16;54(4):953–69. doi: 10.4143/crt.2022.329 (PMC9582460; doi:10.4143/crt.2022.329), 2022-08-16
Supplement: crt-2022-329_S4_Fig.pdf [file crt-2022-329_S4_Fig.pdf]

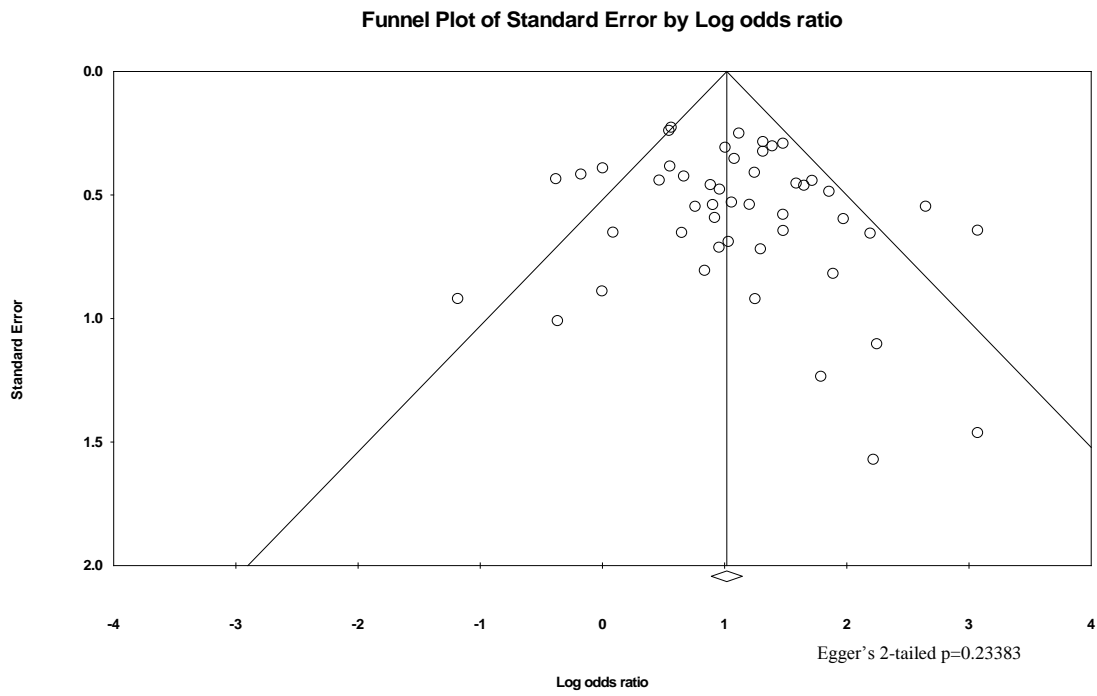

(A)

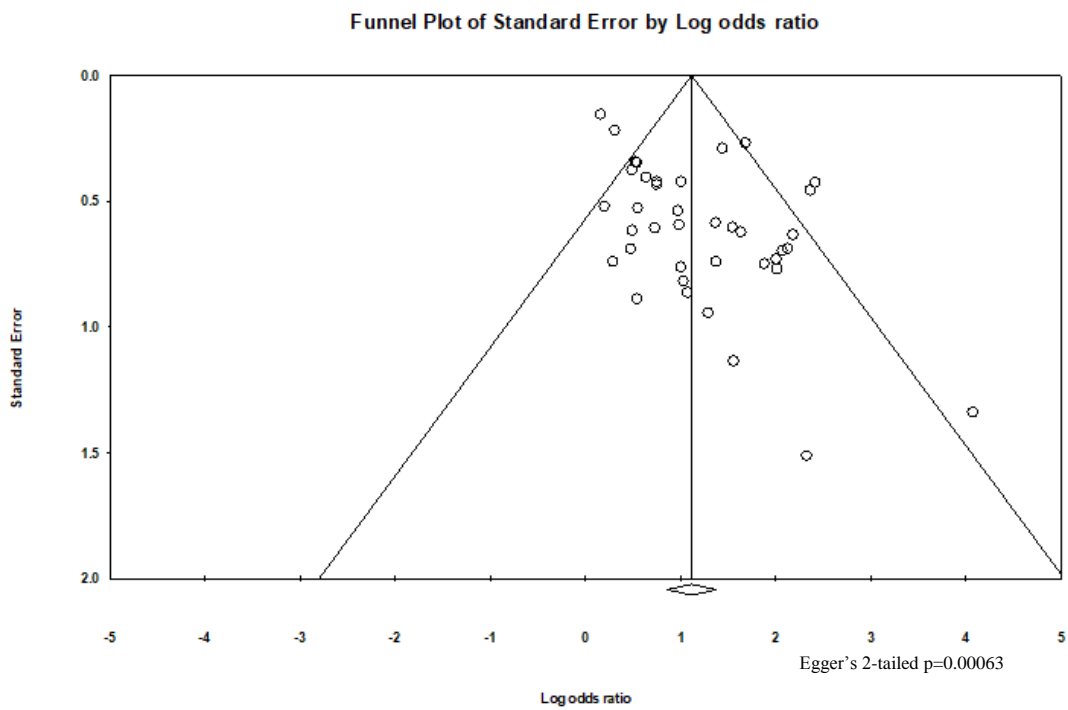

(B)

**S4 Fig.** (A) Funnel plot assessment for overall survival pooled analysis. (B) Funnel plot assessment for progression-free survival pooled analysis.
